# Supplementary material for: Increasing turbidity in the North Sea during the 20th century due to changing wave climate
Source: Copernicus journal article supplement (doi:10.5194/os-15-1615-2019), 2019-12-06

Supplement of Ocean Sci., 15, 1615–1625, 2019  
<https://doi.org/10.5194/os-15-1615-2019-supplement>  
© Author(s) 2019. This work is distributed under  
the Creative Commons Attribution 4.0 License.

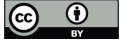

*Supplement of*

## **Increasing turbidity in the North Sea during the 20th century due to changing wave climate**

**Robert J. Wilson and Michael R. Heath**

*Correspondence to:* Robert J. Wilson ([rwi@pml.ac.uk](mailto:rwi@pml.ac.uk))

The copyright of individual parts of the supplement might differ from the CC BY 4.0 License.

**Figure S1: Trends in mean annual SPM in the North Sea (1997-2017) derived from remote sensing data.**

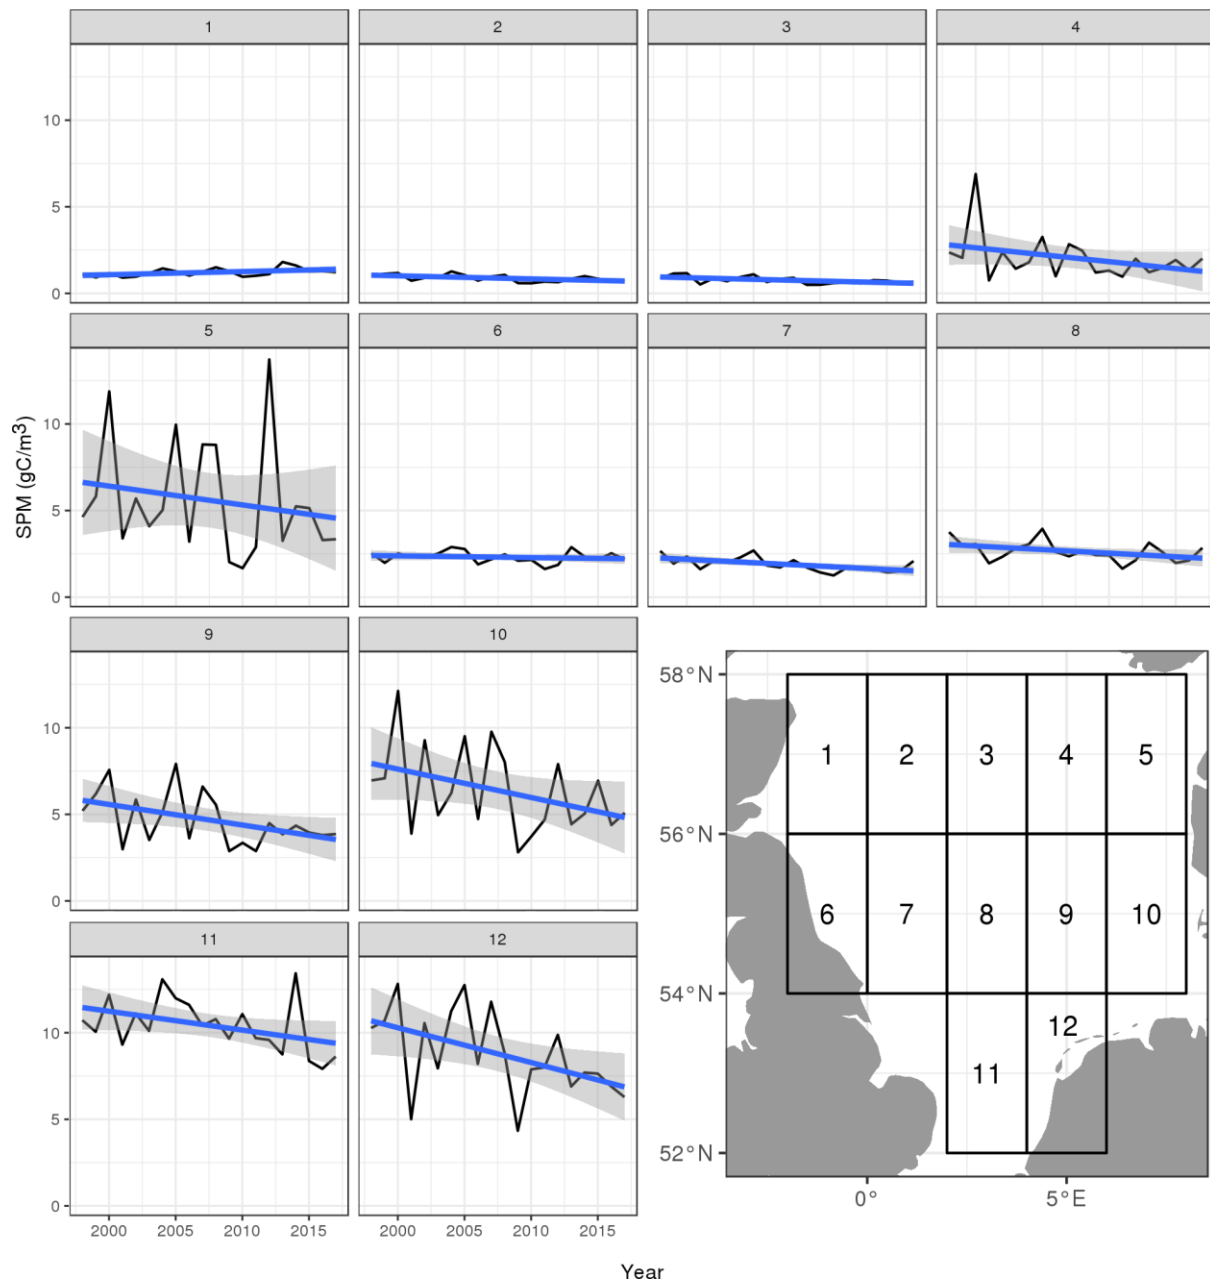

**Figure S2: Trends in mean annual bed shear stress in the North Sea.**

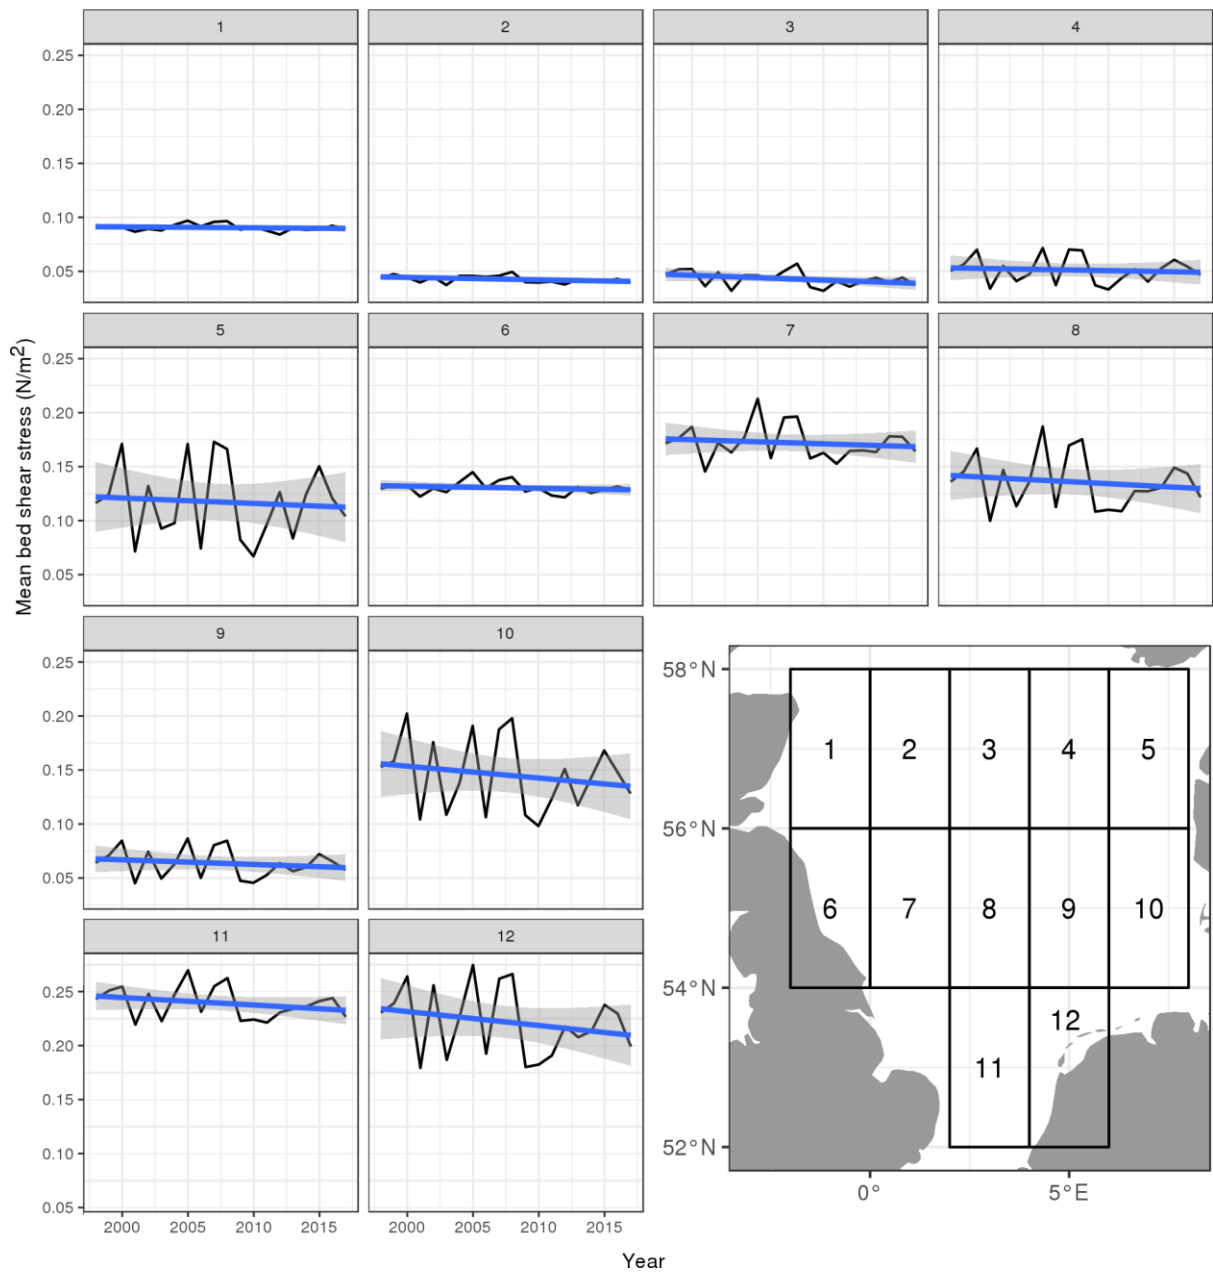

Supplement: Supplementary file 1 [file os-15-1615-2019-supplement.pdf]
